# Supplementary material for: Efficient hydrogen evolution from degenerate-doped p-type WS2 electrocatalysts over a wide pH range
Source: Royal Society of Chemistry journal article supplement (doi:10.1039/d3ta07288f), 2024-01-01
Supplement: d3ta07288f1.pdf [file d3ta07288f1.pdf]

## Supporting Information

### Efficient Hydrogen Evolution from the Hole-Degenerate-Doped WS<sub>2</sub> Electrocatalyst Over a Wide pH Range

Pamula Siva, and Kuraganti Vasu\*

\*E-mail: kuraganti.vasu@vit.ac.in

P. Siva, and K. Vasu

Department of Physics, School of Advanced Sciences, Vellore Institute of Technology, Vellore,

Tamilnadu-632014, India

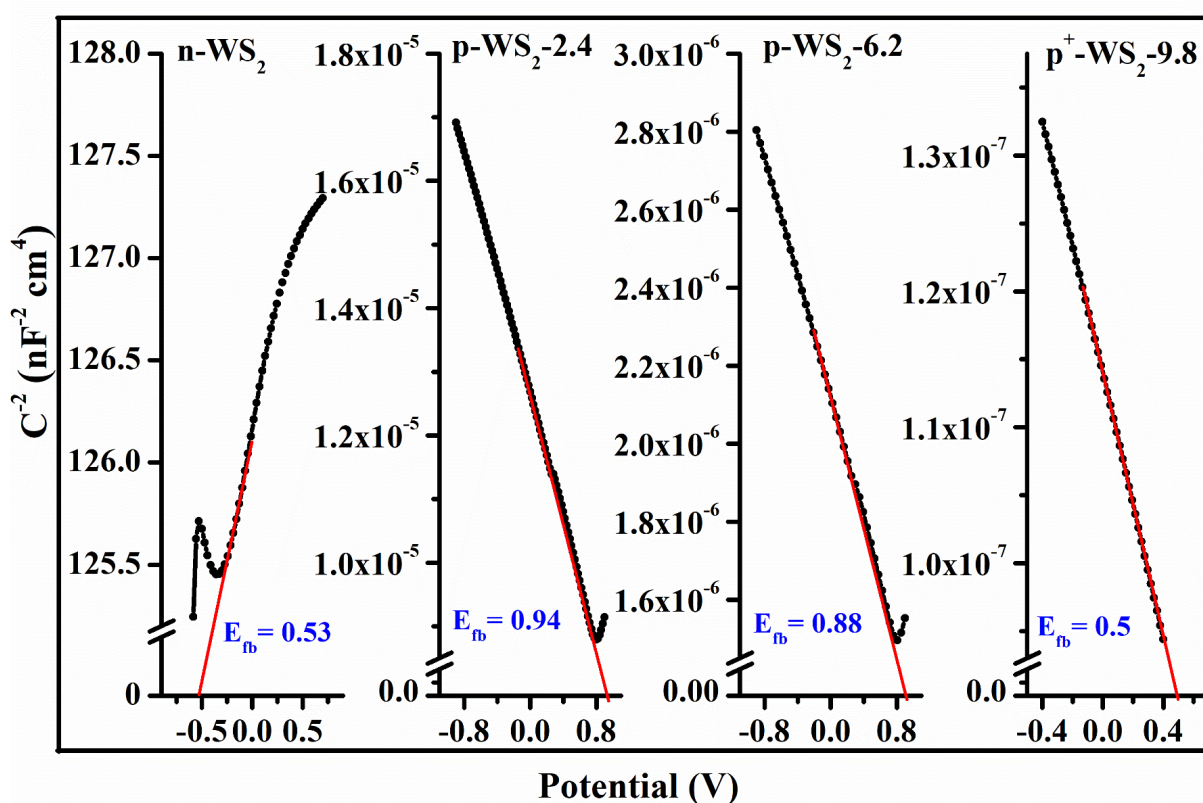

Fig. S1 : Simulated Mott-Schottky plots of *n*-WS<sub>2</sub>, *p*-WS<sub>2</sub>-2.4, *p*-WS<sub>2</sub>-6.2 and *p*<sup>+</sup>-WS<sub>2</sub>-9.8 semiconductor electrocatalysts generated from SCAPS software

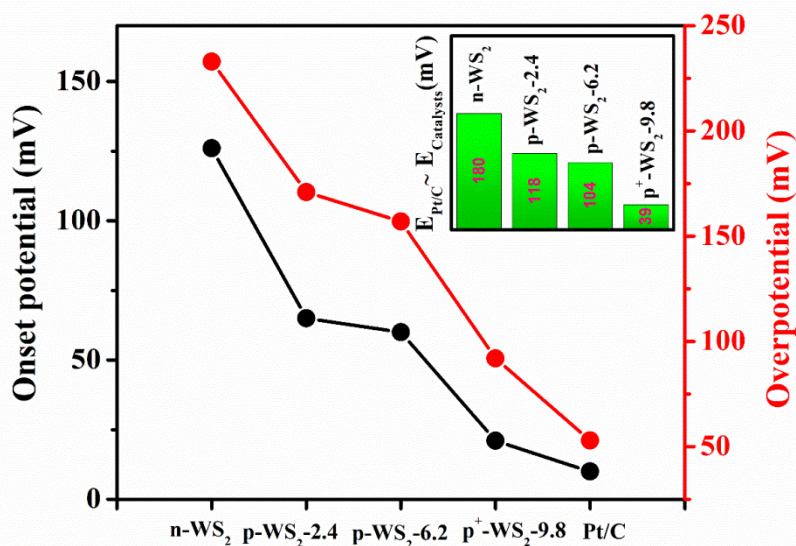

**Fig. S2** Variation of onset potential (@ 1 mA cm<sup>-2</sup>) and overpotentials (@ 10 mA cm<sup>-2</sup>) of all catalysts for different Ir concentration in 0.5M H<sub>2</sub>SO<sub>4</sub> electrolyte. The overpotential difference from the standard Pt/C ( $E_{Pt/C} - E_{Catalyst}$ ) electrode at  $j=10$  mA cm<sup>-2</sup> shown in inset.

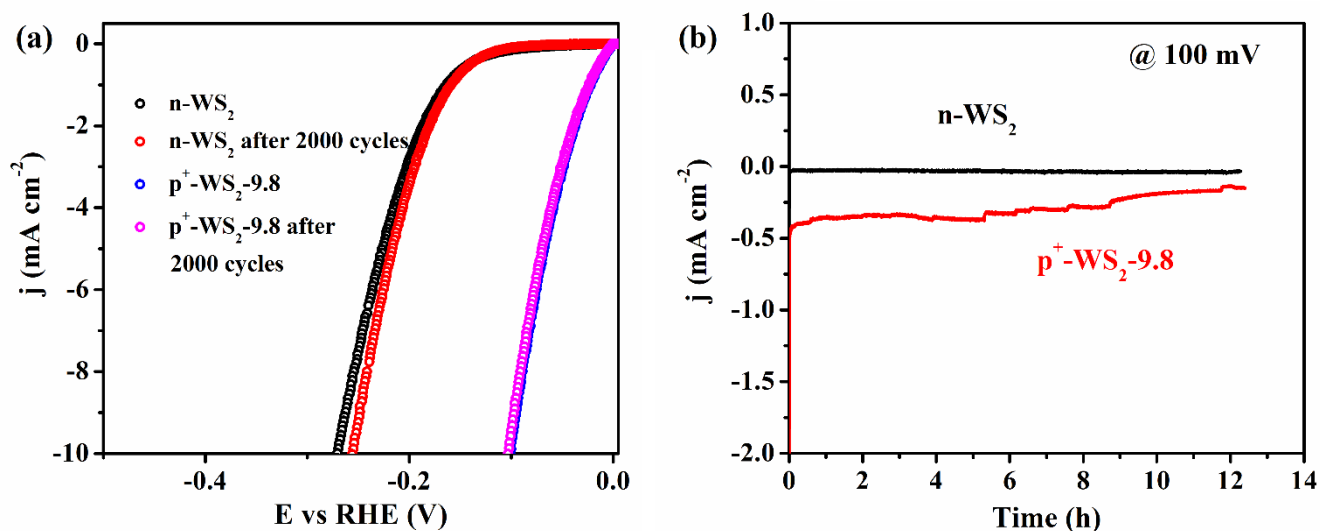

**Fig. S3** (a) Comparative cyclic voltammetry stability test data for 2000 cycles and (b) chronoamperometry durability measurement of  $n$ -WS<sub>2</sub> and  $p^+$ -WS<sub>2</sub>-9.8 electrocatalysts in 0.5M H<sub>2</sub>SO<sub>4</sub> electrolyte

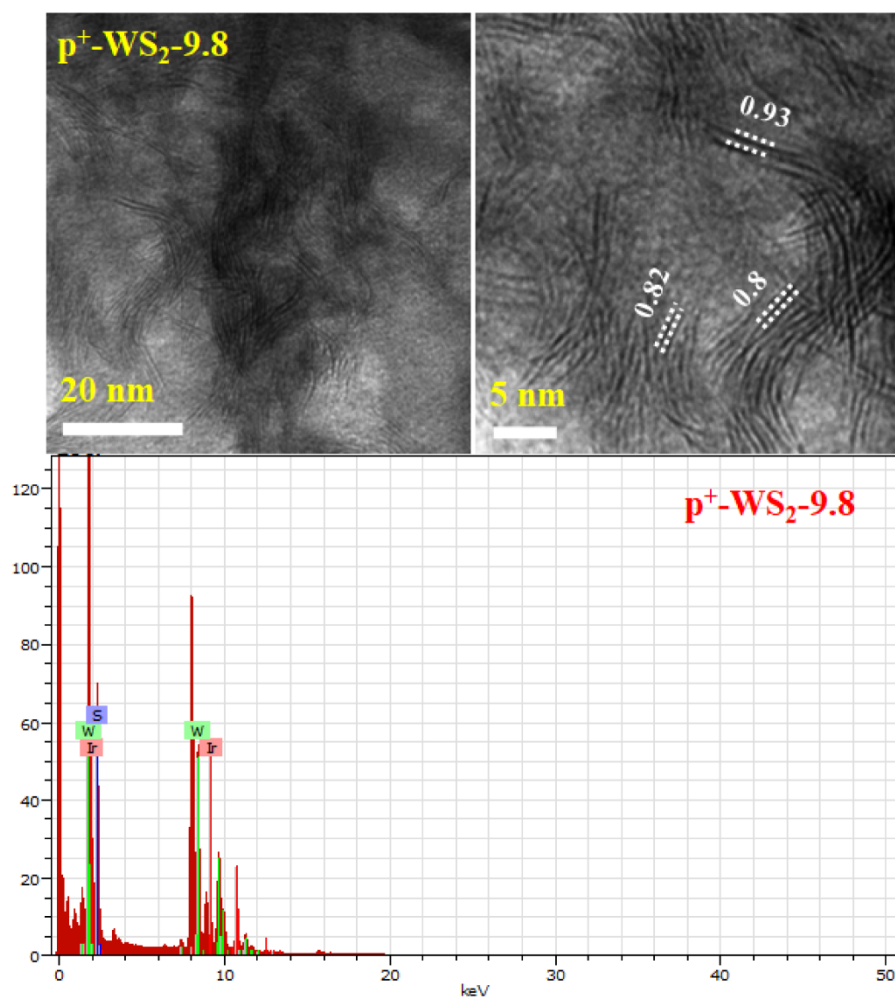

**Fig. S4** (a) Low and (b) high-resolution TEM images, and (c) EDX spectra of  $p^+$ -WS<sub>2</sub>-9.8 after 2000 cycles voltammetry stability in 0.5M H<sub>2</sub>SO<sub>4</sub> electrolyte

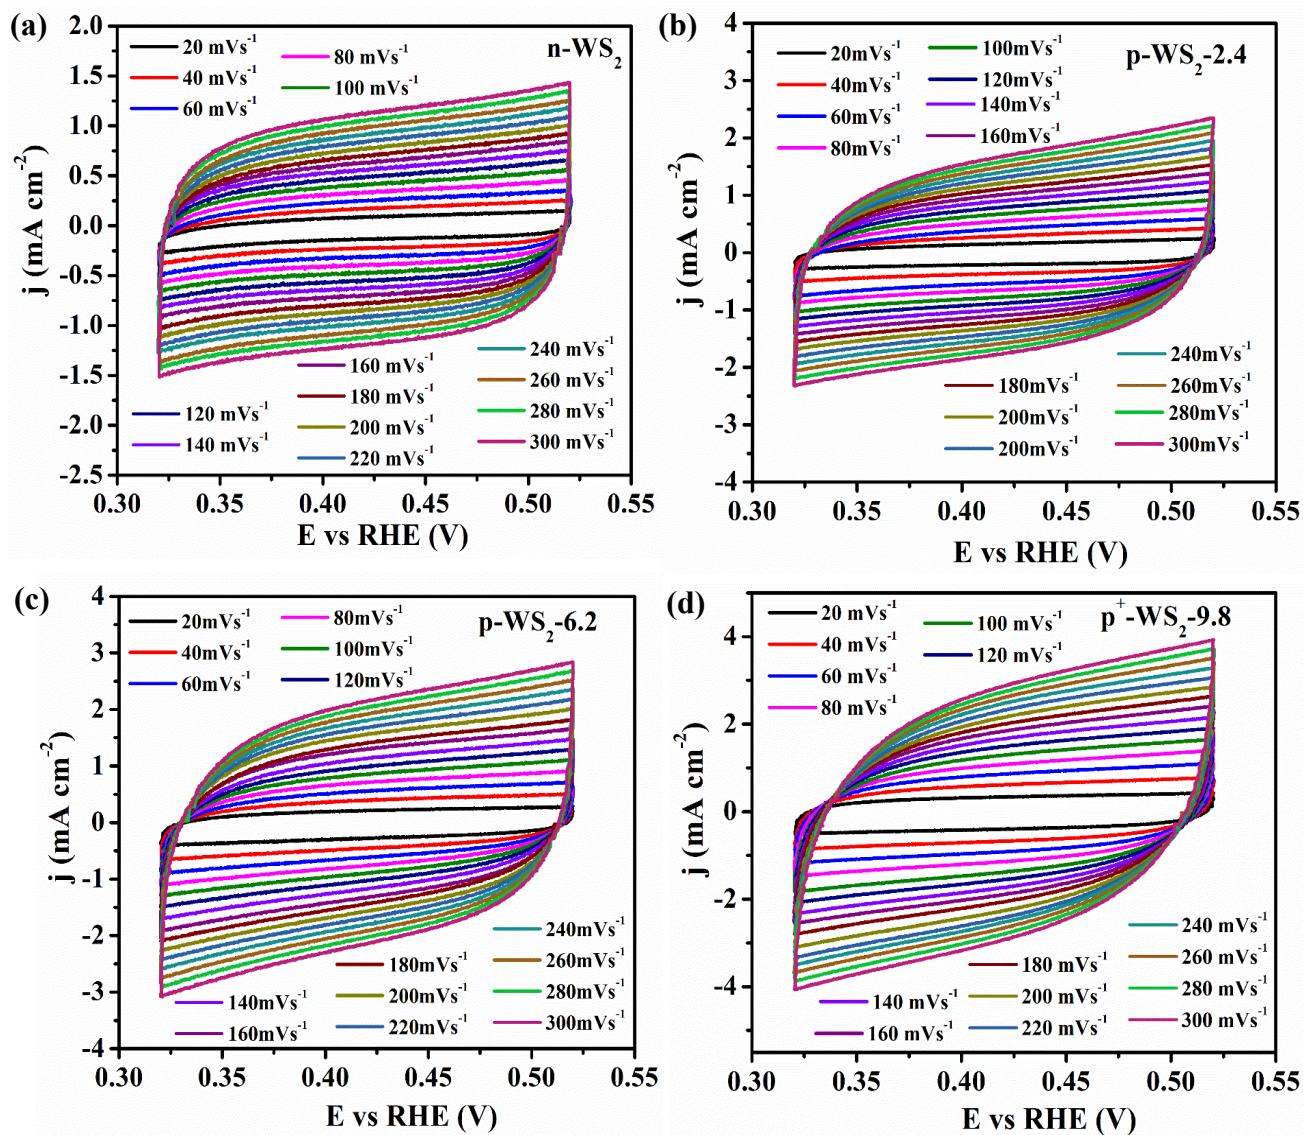

**Fig. S5** Cyclic voltammetry curve of  $n$ -WS<sub>2</sub>,  $p$ -WS<sub>2</sub>-2.4,  $p$ -WS<sub>2</sub>-6.2 and  $p^+$ -WS<sub>2</sub>-9.8 semiconductors catalysts for different scan rate measured in 0.5 M H<sub>2</sub>SO<sub>4</sub> electrolyte. .

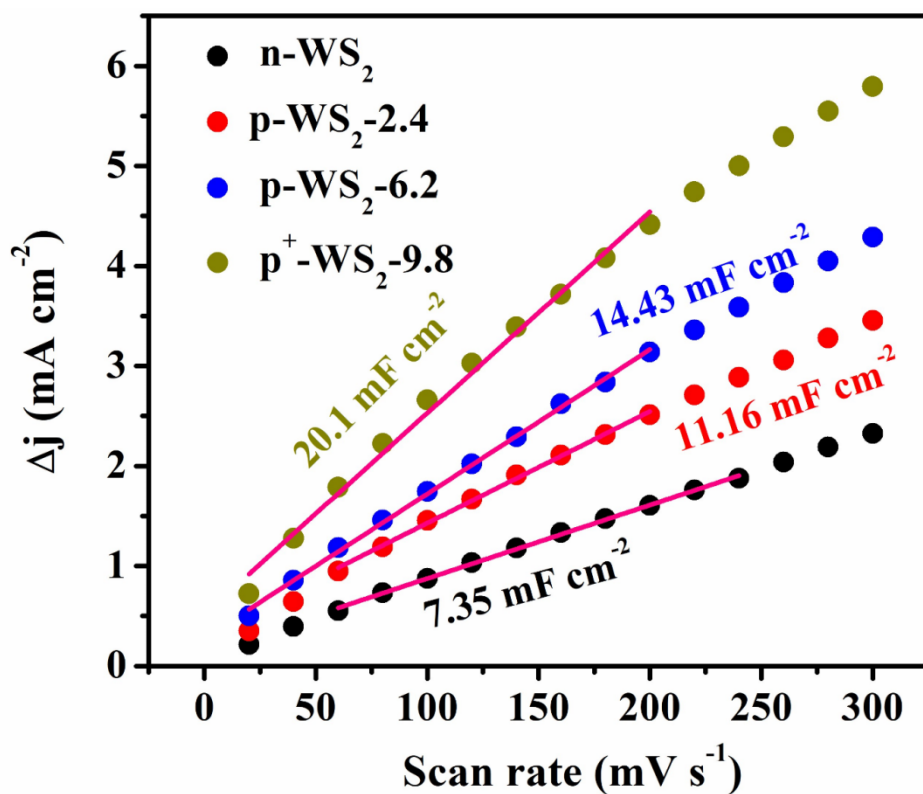

**Fig. S6** Specific capacitance data of  $n$ -WS<sub>2</sub>,  $p$ -WS<sub>2</sub>-2.4,  $p$ -WS<sub>2</sub>-6.2, and  $p^+$ -WS<sub>2</sub>-9.8 electrocatalysts measured in 0.5M H<sub>2</sub>SO<sub>4</sub> electrolyte.

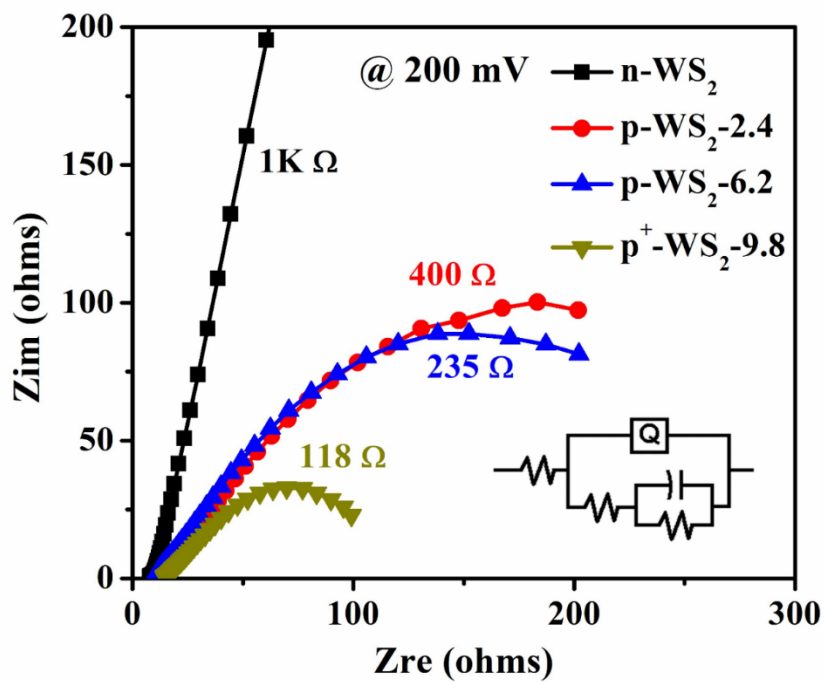

**Fig. S7** Nyquist plots of *n*-WS<sub>2</sub>, *p*-WS<sub>2</sub>-2.4, *p*-WS<sub>2</sub>-6.2, and *p*<sup>+</sup>-WS<sub>2</sub>-9.8 electrocatalysts measured in 0.5M H<sub>2</sub>SO<sub>4</sub> electrolyte

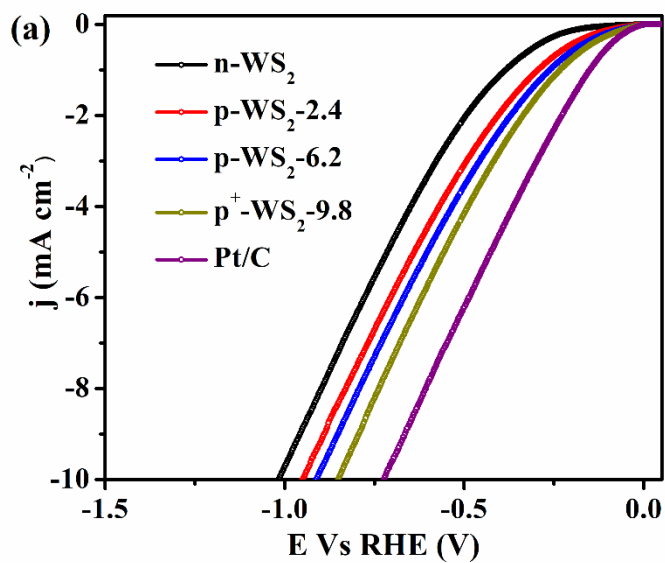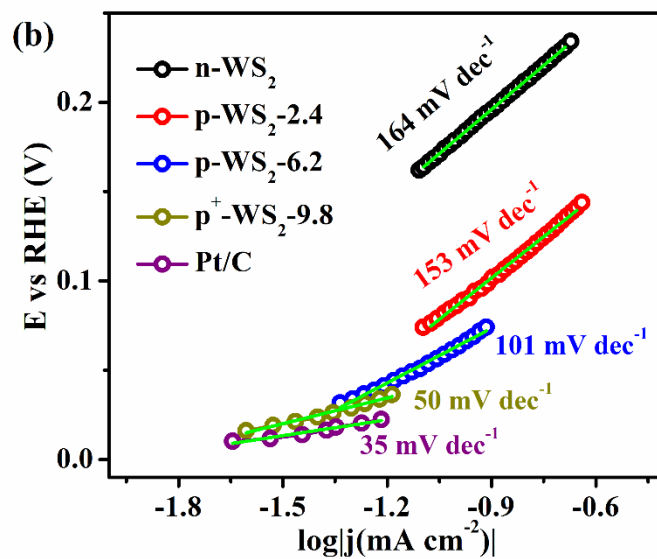

attinity (eV)

Effective DOS

CB (cm<sup>-3</sup>)

2.02x10<sup>19</sup> 2.02x10<sup>19</sup>

2.02x10<sup>19</sup>

2.02x10<sup>19</sup>

**Fig. S8** (a) HER polarization with corresponding (d) Tafel plots of *n*-WS<sub>2</sub>, *p*-WS<sub>2</sub>-2.4, *p*-WS<sub>2</sub>-6.2, and *p*<sup>+</sup>-WS<sub>2</sub>-9.8 measured in 0.01 M KOH electrolyte (pH = 12).

|                                                   |                  |                       |                       |                       |                       |
|---------------------------------------------------|------------------|-----------------------|-----------------------|-----------------------|-----------------------|
| Effective DOS<br>VB (cm <sup>-3</sup> )           |                  | 2.48x10 <sup>19</sup> | 2.48x10 <sup>19</sup> | 2.48x10 <sup>19</sup> | 2.48x10 <sup>19</sup> |
| Electron<br>mobility<br>(cm <sup>2</sup> /Vs)     |                  | 200                   | 200                   | 200                   | 200                   |
| Hole mobility<br>(cm <sup>2</sup> /Vs)            |                  | 50                    | 50                    | 50                    | 50                    |
| Doping density<br>(cm <sup>-3</sup> )             |                  | 8x10 <sup>17</sup>    | 3x10 <sup>18</sup>    | 8.3x10 <sup>18</sup>  | 4x10 <sup>19</sup>    |
| Workfunction<br>(eV)                              | 4.5              |                       |                       |                       | 5                     |
| Electron<br>charge<br>transfer<br>velocity (cm/s) | 10 <sup>1</sup>  |                       |                       |                       | 10 <sup>10</sup>      |
| Hole charge<br>transfer<br>velocity (cm/s)        | 10 <sup>10</sup> |                       |                       |                       | 10 <sup>1</sup>       |

**Table T1**

SCAPS simulation software data used to generate electronic band structure of *n*-WS<sub>2</sub>, *p*-WS<sub>2</sub>-2.4, *p*-WS<sub>2</sub>-6.2 and *p*<sup>+</sup>-WS<sub>2</sub>-9.8 semiconductors catalysts at flat band condition including glass carbon electrode (electrode contact) and 0.5 M H<sub>2</sub>SO<sub>4</sub> electrolyte (electrolyte contact) data.

**Table T2**

Summary of the HER activity of WS<sub>2</sub> based electrocatalysts measured at different scan rate.



| S.No. | Catalyst                                                | Electrolyte                                                                         | Scan rate<br>(mV s <sup>-1</sup> ) | Overpotential<br>(mV) @ $\eta_{10}$<br>(mA cm <sup>-2</sup> ) | References |
|-------|---------------------------------------------------------|-------------------------------------------------------------------------------------|------------------------------------|---------------------------------------------------------------|------------|
| 1.    | V SAC@1T-WS <sub>2</sub>                                | 0.5M H <sub>2</sub> SO <sub>4</sub>                                                 | 5                                  | 61                                                            | 1          |
| 2.    | Te doped WS <sub>2</sub>                                | 0.5M H <sub>2</sub> SO <sub>4</sub>                                                 | 5                                  | 116                                                           | 2          |
| 3.    | W <sub>2</sub> C@WS <sub>2</sub><br>nanoflowers         | 0.5M H <sub>2</sub> SO <sub>4</sub>                                                 | 10                                 | 320                                                           | 3          |
| 4.    | NiS/WS <sub>2</sub> /Ni <sub>3</sub> S <sub>4</sub>     | 1M KOH/0.5M H <sub>2</sub> SO <sub>4</sub>                                          | 5                                  | 50/60                                                         | 4          |
| 5.    | MOF-derived<br>CoS <sub>2</sub> /WS <sub>2</sub>        | 0.5M H <sub>2</sub> SO <sub>4</sub>                                                 | 5                                  | 79                                                            | 5          |
| 6.    | Ag/MCNT/WS <sub>2</sub>                                 | 1M KOH/0.5M H <sub>2</sub> SO <sub>4</sub>                                          | 5                                  | 218.9/182                                                     | 6          |
| 7.    | WS <sub>2</sub> @Co <sub>9</sub> S <sub>8</sub>         | 1M KOH                                                                              | 5                                  | 274                                                           | 7          |
| 8.    | 1 T-Co <sub>4</sub> S <sub>3</sub> -WS <sub>2</sub> /CC | 1M KOH                                                                              | 5                                  | 75                                                            | 8          |
| 9.    | CeO <sub>2</sub> /WS <sub>2</sub> /CC                   | 0.5M H <sub>2</sub> SO <sub>4</sub>                                                 | 2                                  | 128                                                           | 9          |
| 10.   | MoS <sub>2</sub> /WS <sub>2</sub> -rGO                  | 1M KOH                                                                              | 10                                 | 118                                                           | 10         |
| 11.   | Fe <sub>x</sub> S <sub>y</sub> /WS <sub>2</sub>         | 0.5 M H <sub>2</sub> SO <sub>4</sub>                                                | 5                                  | 118                                                           | 11         |
| 12.   | SA-Ru-MoS <sub>2</sub>                                  | 1M KOH                                                                              | 2                                  | 76                                                            | 12         |
| 13.   | WS <sub>2</sub> /WSe <sub>2</sub>                       | 0.5 M H <sub>2</sub> SO <sub>4</sub>                                                | 5                                  | 121                                                           | 13         |
| 14.   | N-WS <sub>2</sub> -CC-60                                | 1M KOH/0.5M H <sub>2</sub> SO <sub>4</sub>                                          | 5                                  | 175/170                                                       | 14         |
| 15.   | 1T-CoWS/HMCS                                            | 0.5 M H <sub>2</sub> SO <sub>4</sub>                                                | 5                                  | 25                                                            | 15         |
| 16.   | CoS <sub>2</sub> @WS <sub>2</sub> /CC                   | 0.5 M H <sub>2</sub> SO <sub>4</sub>                                                | 0.5                                | 97.2                                                          | 16         |
| 17.   | Phosphorus doped<br>WS <sub>2</sub>                     | 0.5 M H <sub>2</sub> SO <sub>4</sub>                                                | 5                                  | 88                                                            | 17         |
| 18.   | Co-WS <sub>2</sub>                                      | 0.5 M H <sub>2</sub> SO <sub>4</sub>                                                | 5                                  | 255                                                           | 18         |
| 19.   | 400WS/CC                                                | 0.5 M H <sub>2</sub> SO <sub>4</sub> /1M<br>KOH                                     | 5                                  | 178/235                                                       | 19         |
| 20.   | 1 T-WS <sub>2</sub>  P-5                                | 0.5 M H <sub>2</sub> SO <sub>4</sub> /1M<br>KOH                                     | 5                                  | 125/190                                                       | 20         |
| 21.   | 5% Co-WS <sub>2</sub>                                   | 0.5 M H <sub>2</sub> SO <sub>4</sub> /0.5M<br>KOH                                   | 10                                 | 321/337                                                       | 21         |
| 22.   | p <sup>+</sup> -WS <sub>2</sub> -9.8                    | 0.5 M H <sub>2</sub> SO <sub>4</sub> /1M<br>KOH /1M Na <sub>2</sub> SO <sub>4</sub> | 20                                 | 92/248/548                                                    | This work  |

#### References:

- 1 A. Han, X. Zhou, X. Wang, S. Liu, Q. Xiong, Q. Zhang, L. Gu, Z. Zhuang, W. Zhang, F. Li, D. Wang, L. J. Li and Y. Li, *Nat. Commun.*, 2021, **12**, 709.
- 2 Y. Pan, F. Zheng, X. Wang, H. Qin, E. Liu, J. Sha, N. Zhao, P. Zhang and L. Ma, *J. Catal.*, 2020, **382**, 204–211.
- 3 T. P. Nguyen, S. Y. Kim, T. H. Lee, H. W. Jang, Q. Van Le and I. T. Kim, *Appl. Surf. Sci.*, 2020, **504**, 144389.
- 4 H. Wang, M. Ma, J. Li, Z. Zhang, W. Zhou and H. Liu, *J. Mater. Chem. A*, 2021, **9**, 25539–25546.
- 5 C. Yao, Q. Wang, C. Peng, R. Wang, J. Liu, N. Tsidaeva and W. Wang, *Chem. Eng. J.*, 2024, **479**, 147924.

- 6 X. Ma, Z. Lin, T. Feng and G. Liu, *Energy & Fuels*, 2023, **37**, 16824–16832.
- 7 L. Xia, K. Pan, H. Wu, F. Wang, Y. Liu, Y. Xu, Z. Dong, B. Wei and S. Wei, *ACS Appl. Mater. Interfaces*, 2022, **14**, 22030-22040.
- 8 Q. Peng, X. Shao, C. Hu, Z. Luo, T. T. Isimjan, Z. Dou, R. Hou and X. Yang, *J. Colloid Interface Sci.*, 2022, **615**, 577–586.
- 9 H. Chen, M. Hu, P. Jing, B. Liu, R. Gao and J. Zhang, *J. Power Sources*, 2022, **521**, 230948.
- 10 X. Xu, W. Xu, L. Zhang, G. Liu, X. Wang, W. Zhong and Y. Du, *Sep. Purif. Technol.*, 2021, **278**, 119569.
- 11 H. Chen, Y. Li, H. Huang, Q. Kang and T. Ma, *Energy & Fuels*, 2022, **36**, 4888–4894.
- 12 J. Zhang, X. Xu, L. Yang, D. Cheng and D. Cao, *Small Methods*, 2019, **3**, 1900653.
- 13 L. Sun, H. Xu, Z. Cheng, D. Zheng, Q. Zhou, S. Yang and J. Lin, *Chem. Eng. J.*, 2022, **443**, 136348.
- 14 H. Wang, Z. Xu, Z. Zhang, S. Hu, M. Ma, Z. Zhang, W. Zhou and H. Liu, *Nanoscale*, 2020, **12**, 22541–22550.
- 15 C. Yue, F. Sun, N. Liu, Y. Liu, W. Bao, X. Zhang, C. Zhang, S. Ma, Y. Zhou and C. Feng, *Fuel*, 2024, **357**, 129668.
- 16 X. Zhou, X. Yang, H. Li, M. N. Hedhili, K.-W. Huang, L.-J. Li and W. Zhang, *J. Mater. Chem. A*, 2017, **5**, 15552–15558.
- 17 F. Wang, S. Niu, X. Liang, G. Wang and M. Chen, *Nano Res.*, 2022, 1–7.
- 18 L. Zhou, S. Yan, H. Song, H. Wu and Y. Shi, *Sci. Rep.*, 2019, **9**, 1357.
- 19 Q. Zhu, W. Chen, H. Cheng, Z. Lu and H. Pan, *ChemCatChem*, 2019, **11**, 2667–2675.
- 20 L. Sun, M. Gao, Z. Jing, Z. Cheng, D. Zheng, H. Xu, Q. Zhou and J. Lin, *Chem. Eng. J.*, 2022, **429**, 132187.
- 21 S. R. Kadam, R. Bar-Ziv and M. Bar-Sadan, *New J. Chem.*, 2022, **46**, 20102–20107.
